# Supplementary material for: Highly sensitive and rapid visual detection of ricin using unmodified gold nanoparticle probes
Source: Royal Society of Chemistry journal article supplement (doi:10.1039/c4ra06001f), 2014-01-01
Supplement: c4ra06001f1.pdf [file c4ra06001f1.pdf]

# Highly sensitive and rapid visual detection of ricin using unmodified gold nanoparticle probes

Jingting Hu <sup>a,b</sup>, Haichao Dai <sup>a,b</sup>, Yujing Sun <sup>a</sup>, Pengjuan Ni <sup>a,b</sup>, Yilin

Wang<sup>a,b</sup>, Shu Jiang <sup>a,b</sup>, Zhuang Li <sup>a,\*</sup>

*<sup>a</sup>State Key Laboratory of Electroanalytical Chemistry, Changchun Institute of  
Applied Chemistry, University of the Chinese Academy of Sciences, Changchun, Jilin  
130022, China*

*<sup>b</sup>University of the Chinese Academy of Sciences, Beijing 100049, China*

**Fig. S1.** Hydrodynamic diameter of AuNPs measured by DLS in different solution. (A) 2.78 nM AuNPs solution mixed with 83 nM RBA for 5 min after the addition of 0.138 M NaCl. (B) 2.78 nM AuNPs solution in the presence of 83 nM RBA and 3.08 nM ricin for 5 min after the addition of 0.138 M NaCl.

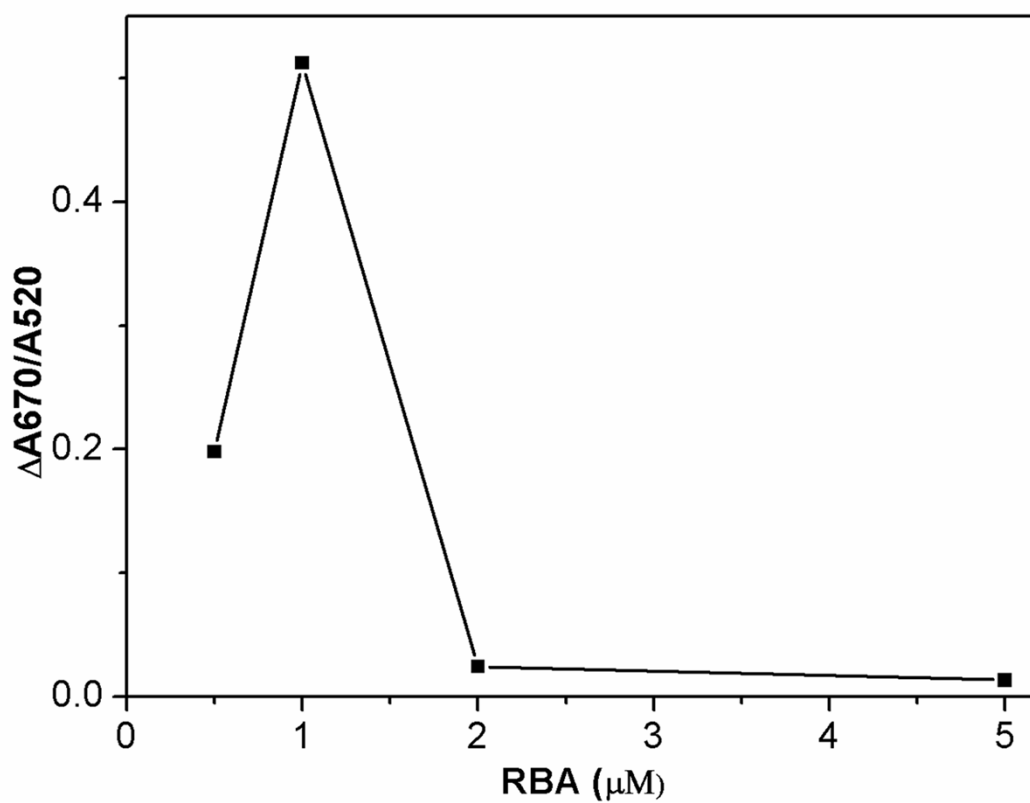

**Fig. S2.** Effect of aptamer amount on the sensitivity of ricin detection .

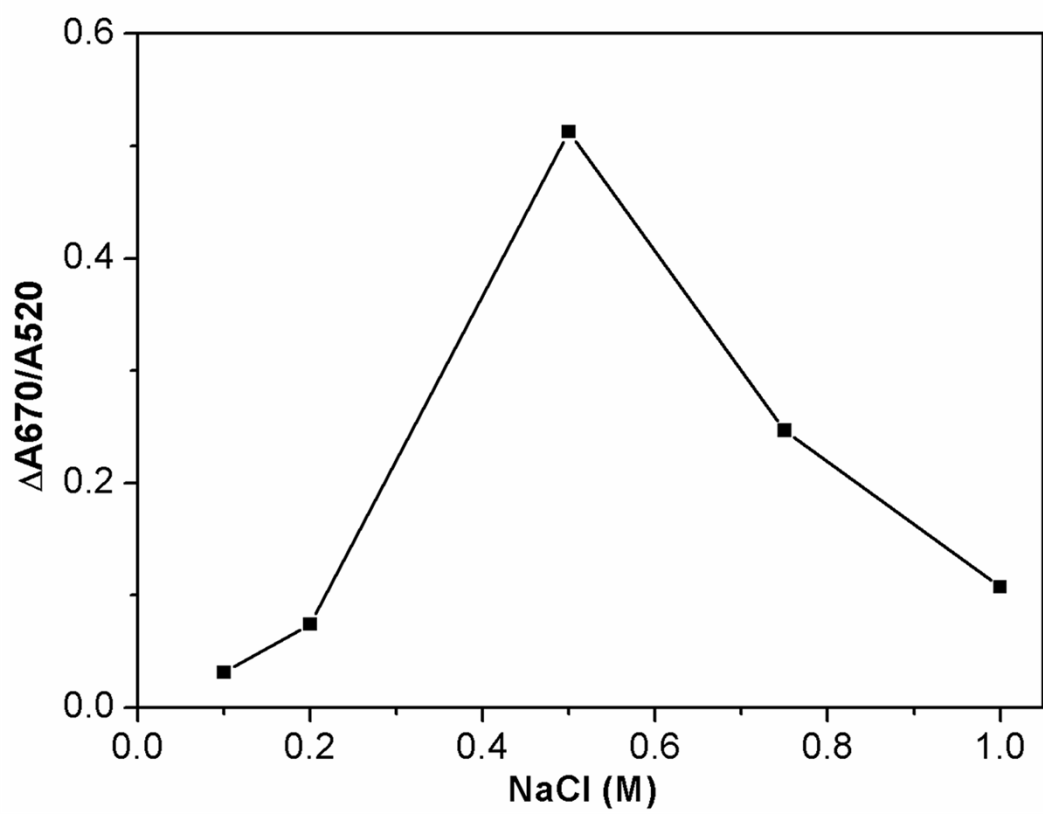

**Fig. S3.** Effect of salt concentrations on the sensitivity of ricin detection.

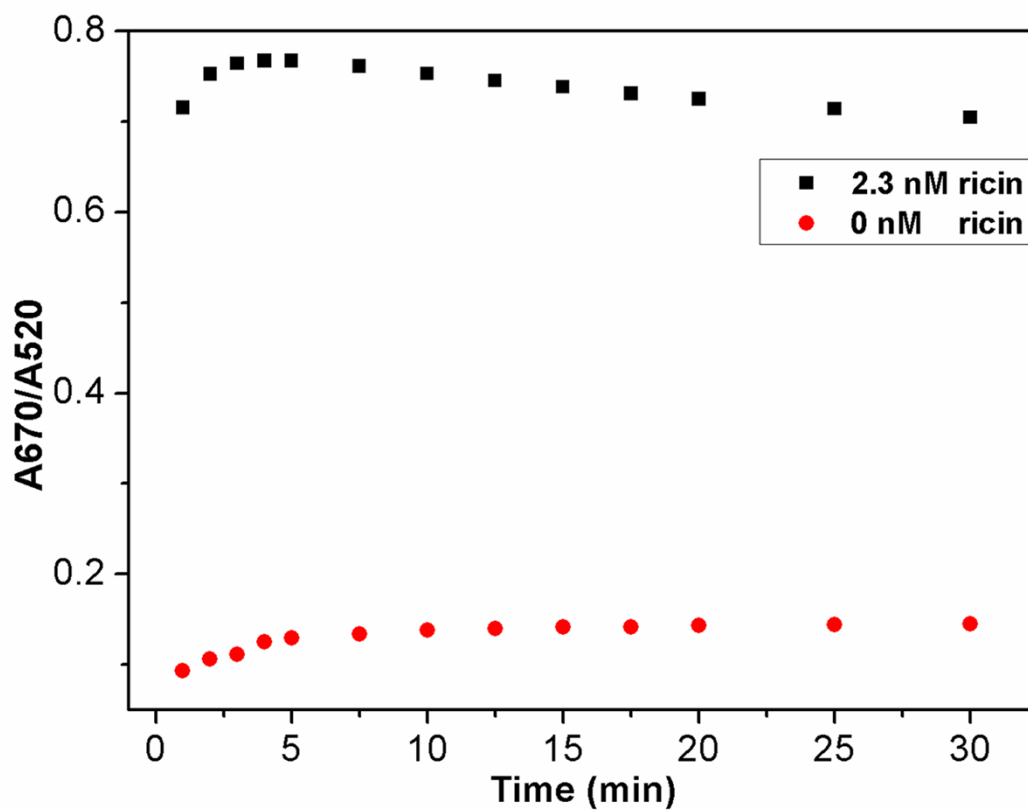

**Fig. S4.** Effect of the reaction time after adding NaCl on the sensitivity of ricin detection.
